# Supplementary material
Source: Springer Nature journal article supplement (https://www.springermedizin.de/resource/supplementary/12885_2012_3757_MOESM3_ESM.pdf/9464330)

Median overall survival (months)

0 20 40 60 80 100 120 140

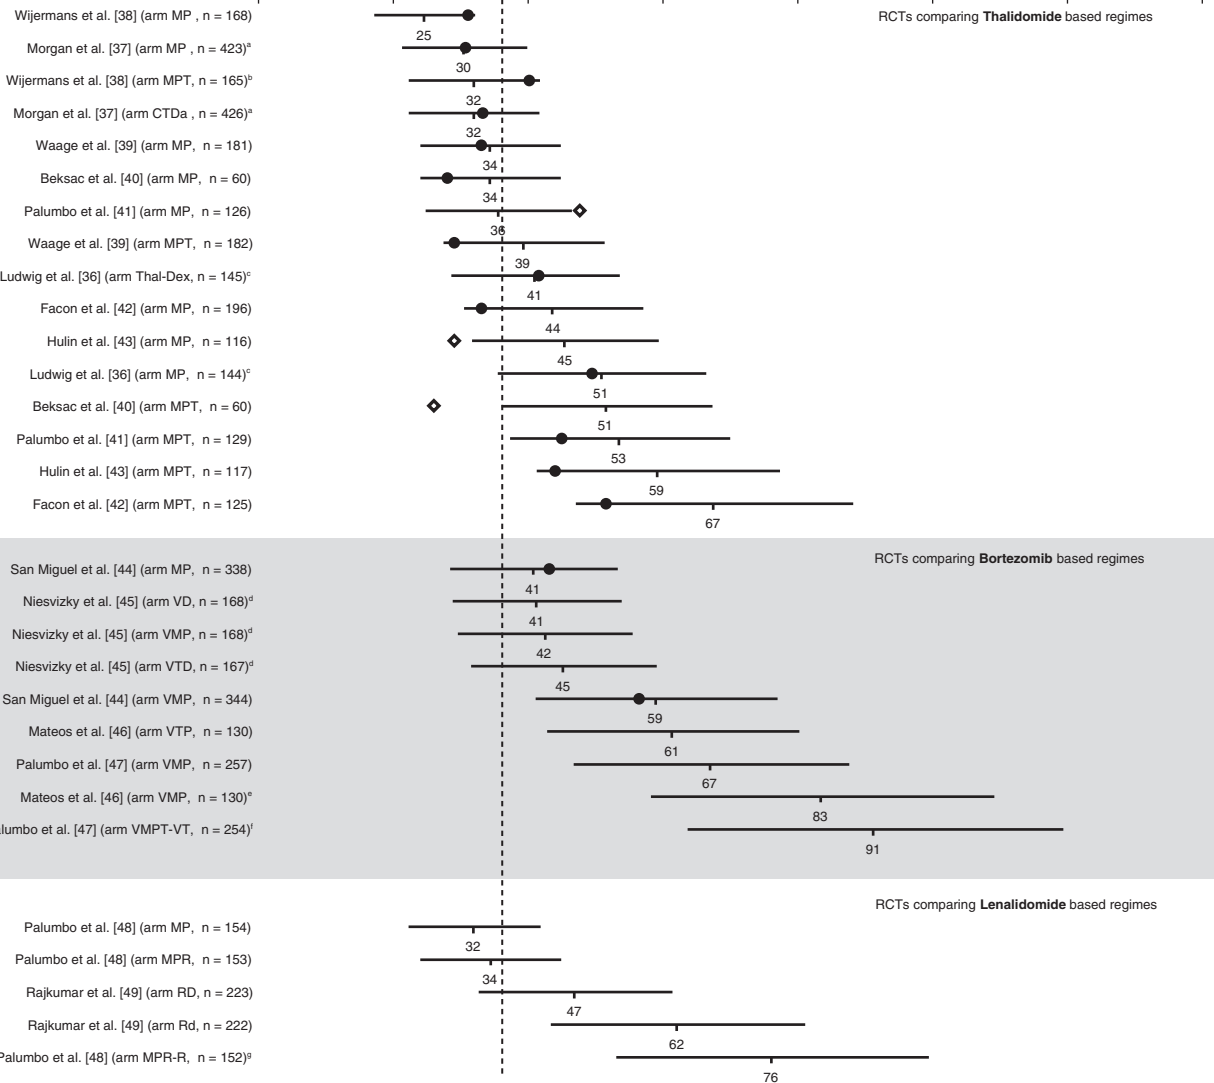

Supplement: MOESM3 [file 9464330]
